# Supplementary material for: Genetic Variability of the mTOR Pathway and Prostate Cancer Risk in the European Prospective Investigation on Cancer (EPIC)
Source: PLoS One. 2011 Feb 23;6(2):e16914. doi: 10.1371/journal.pone.0016914 (PMC3044148; doi:10.1371/journal.pone.0016914)
Supplement: Table S4 — Analyses in subgroups of disease aggressiveness. Columns in this table show: gene name, NCBI dbSNP rs number, possible genotypes, numbers of cases and controls for each of the three genotypes, odds ratios for heterozygotes and for homozygotes for the rare allele (referred to the homozygotes for the common allele), with 95% confidence interval, Cochran's Q parameter, I2 statistic, p-value of the test for heterogeneity, p-value of the trend test for each stratum, name of the stratum. (XLS) [file pone.0016914.s005.xls]

## Sheet: BYcancertype
Gene	SNP	Genotypes			Cases			Controls
		A/A	A/B	B/B	A/A	A/B	B/B	A/A	A/B	B/B	ORhet (95% CI)	ORhom (95% CI)	Q	Isquare	phtr	ptrend	Stratum
GADD45A	rs520820	G G	G A	A A	976	561	69	1175	717	119	0.99 (0.84-1.16)	0.70 (0.49-0.99)	0.0181575	0	0.89281	0.169757	ALL
GADD45A	rs520820	G G	G A	A A	132	93	10	169	118	21	1.10 (0.73-1.66)	0.50 (0.20-1.23)				0.517975	aggressive
GADD45A	rs520820	G G	G A	A A	844	468	59	1006	599	98	0.96 (0.81-1.15)	0.75 (0.51-1.11)				0.239505	non-aggressive
GADD45B	rs3783501	A A	A G	G G	408	820	365	590	1003	421	1.15 (0.96-1.37)	1.20 (0.97-1.48)	1.16557	14.2051	0.280313	0.086986	ALL
GADD45B	rs3783501	A A	A G	G G	56	122	54	103	138	66	1.50 (0.95-2.39)	1.56 (0.89-2.74)				0.100815	aggressive
GADD45B	rs3783501	A A	A G	G G	352	698	311	487	865	355	1.10 (0.90-1.33)	1.14 (0.91-1.44)				0.248684	non-aggressive
PIK3R1	rs13156223	C C	C G	G G	918	564	106	1165	735	89	0.98 (0.84-1.15)	1.33 (0.95-1.86)	0.359733	0	0.548654	0.346171	ALL
PIK3R1	rs13156223	C C	C G	G G	144	74	13	180	109	13	0.84 (0.55-1.28)	1.31 (0.52-3.31)				0.834996	aggressive
PIK3R1	rs13156223	C C	C G	G G	774	490	93	985	626	76	1.01 (0.85-1.20)	1.34 (0.94-1.92)				0.275605	non-aggressive
PIK3R1	rs706711	G G	G A	A A	506	751	335	655	1014	343	0.94 (0.79-1.11)	1.19 (0.96-1.48)	0.13067	0	0.717738	0.203599	ALL
PIK3R1	rs706711	G G	G A	A A	84	106	45	109	153	47	0.85 (0.55-1.31)	1.14 (0.64-2.06)				0.869998	aggressive
PIK3R1	rs706711	G G	G A	A A	422	645	290	546	861	296	0.96 (0.80-1.16)	1.21 (0.96-1.53)				0.176453	non-aggressive
PIK3R1	rs831123	G G	G C	C C	1309	256	22	1589	354	18	0.91 (0.74-1.11)	1.19 (0.61-2.32)	0.00216798	0	0.962863	0.577472	ALL
PIK3R1	rs831123	G G	G C	C C	191	39	5	240	64	3	0.81 (0.48-1.39)	1.58 (0.36-6.97)				0.797859	aggressive
PIK3R1	rs831123	G G	G C	C C	1118	217	17	1349	290	15	0.93 (0.74-1.16)	1.09 (0.51-2.31)				0.642828	non-aggressive
PRKAG2	rs11763144	C C	C G	G G	1216	359	27	1466	507	44	0.89 (0.74-1.06)	0.86 (0.49-1.48)	0.592687	0	0.441382	0.169048	ALL
PRKAG2	rs11763144	C C	C G	G G	182	48	5	220	81	8	0.71 (0.45-1.12)	0.94 (0.25-3.53)				0.211942	aggressive
PRKAG2	rs11763144	C C	C G	G G	1034	311	22	1246	426	36	0.92 (0.76-1.12)	0.84 (0.46-1.54)				0.340708	non-aggressive
PRKCI	rs4955720	C C	C A	A A	637	725	218	710	959	331	0.89 (0.75-1.05)	0.75 (0.60-0.94)	0.00458093	0	0.946038	0.0124582	ALL
PRKCI	rs4955720	C C	C A	A A	94	110	30	116	149	41	0.89 (0.58-1.35)	0.77 (0.41-1.44)				0.394337	aggressive
PRKCI	rs4955720	C C	C A	A A	543	615	188	594	810	290	0.89 (0.75-1.07)	0.75 (0.58-0.96)				0.0216274	non-aggressive
PRKCI	rs546950	G G	G A	A A	556	752	303	585	1015	411	0.83 (0.70-0.98)	0.84 (0.68-1.04)	1.15302	13.2715	0.282917	0.0655432	ALL
PRKCI	rs546950	G G	G A	A A	80	114	41	113	135	60	1.29 (0.83-2.00)	1.01 (0.57-1.79)				0.755589	aggressive
PRKCI	rs546950	G G	G A	A A	476	638	262	472	880	351	0.77 (0.64-0.92)	0.81 (0.64-1.03)				0.0397931	non-aggressive
RPS6KA2	rs388372	G G	G A	A A	569	800	199	794	915	272	1.17 (0.99-1.38)	1.02 (0.80-1.30)	0.0776687	0	0.780482	0.375684	ALL
RPS6KA2	rs388372	G G	G A	A A	81	117	29	117	139	48	1.22 (0.79-1.88)	0.91 (0.49-1.70)				0.91905	aggressive
RPS6KA2	rs388372	G G	G A	A A	488	683	170	677	776	224	1.16 (0.97-1.38)	1.05 (0.80-1.37)				0.336742	non-aggressive
TP63	rs6797860	G G	G A	A A	794	685	101	1019	778	169	1.12 (0.95-1.31)	0.77 (0.57-1.04)	0.262694	0	0.608275	0.773352	ALL
TP63	rs6797860	G G	G A	A A	113	106	11	160	115	22	1.34 (0.89-2.02)	0.64 (0.26-1.57)				0.715008	aggressive
TP63	rs6797860	G G	G A	A A	681	579	90	859	663	147	1.08 (0.91-1.28)	0.79 (0.57-1.08)				0.638991	non-aggressive
TSC2	rs13337626	A A	A G	G G	1343	252	9	1716	282	14	1.03 (0.83-1.26)	0.81 (0.33-1.98)	0.224102	0	0.635932	0.969551	ALL
TSC2	rs13337626	A A	A G	G G	198	36	1	262	45	1	1.14 (0.66-1.97)	1.05 (0.06-17.78)				0.644323	aggressive
TSC2	rs13337626	A A	A G	G G	1145	216	8	1454	237	13	1.01 (0.81-1.27)	0.80 (0.31-2.04)				0.903842	non-aggressive
